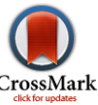

# Characterization of Lignocellulolytic Activities from a Moderate Halophile Strain of *Aspergillus caesiellus* Isolated from a Sugarcane Bagasse Fermentation

Ramón Alberto Batista-García<sup>1,2,3</sup>, Edgar Balcázar-López<sup>1,2,3</sup>, Estefan Miranda-Miranda<sup>3</sup>, Ayixón Sánchez-Reyes<sup>1,2</sup>, Laura Cuervo-Soto<sup>1,2</sup>, Denise Aceves-Zamudio<sup>2</sup>, Karina Atriztán-Hernández<sup>4</sup>, Catalina Morales-Herrera<sup>2</sup>, Rocío Rodríguez-Hernández<sup>2</sup>, Jorge Folch-Mallol<sup>2\*</sup>

**1** Facultad de Ciencias, Universidad Autónoma del Estado de Morelos, Cuernavaca, Morelos, Mexico, **2** Centro de Investigación en Biotecnología, Universidad Autónoma del Estado de Morelos, Cuernavaca, Morelos, México, **3** Centro Nacional de Investigación Disciplinaria en Parasitología Veterinaria, Instituto Nacional de Investigaciones Forestales Agrícolas y Pecuarias, Cuernavaca, Morelos, Mexico, **4** Facultad de Ciencias Biológicas, Universidad Autónoma del Estado de Morelos, Cuernavaca, Morelos, Mexico

## Abstract

A moderate halophile and thermotolerant fungal strain was isolated from a sugarcane bagasse fermentation in the presence of 2 M NaCl that was set in the laboratory. This strain was identified by polyphasic criteria as *Aspergillus caesiellus*. The fungus showed an optimal growth rate in media containing 1 M NaCl at 28°C and could grow in media added with up to 2 M NaCl. This strain was able to grow at 37 and 42°C, with or without NaCl. *A. caesiellus* H1 produced cellulases, xylanases, manganese peroxidase (MnP) and esterases. No laccase activity was detected in the conditions we tested. The cellulase activity was thermostable, halostable, and no differential expression of cellulases was observed in media with different salt concentrations. However, differential band patterns for cellulase and xylanase activities were detected in zymograms when the fungus was grown in different lignocellulosic substrates such as wheat straw, maize stover, agave fibres, sugarcane bagasse and sawdust. Optimal temperature and pH were similar to other cellulases previously described. These results support the potential of this fungus to degrade lignocellulosic materials and its possible use in biotechnological applications.

**Citation:** Batista-García RA, Balcázar-López E, Miranda-Miranda E, Sánchez-Reyes A, Cuervo-Soto L, et al. (2014) Characterization of Lignocellulolytic Activities from a Moderate Halophile Strain of *Aspergillus caesiellus* Isolated from a Sugarcane Bagasse Fermentation. PLoS ONE 9(8): e105893. doi:10.1371/journal.pone.0105893

**Editor:** Melanie R. Mormile, Missouri University of Science and Technology, United States of America

**Received:** April 20, 2014; **Accepted:** July 25, 2014; **Published:** August 27, 2014

**Copyright:** © 2014 Batista-García et al. This is an open-access article distributed under the terms of the Creative Commons Attribution License, which permits unrestricted use, distribution, and reproduction in any medium, provided the original author and source are credited.

**Data Availability:** The authors confirm that all data underlying the findings are fully available without restriction. All relevant data are within the paper and its Supporting Information files.

**Funding:** The work was partially funded by grant CB-153789-Q from the National Council for Science and Technology (CONACyT) from the Mexican government. The funders had no role in study design, data collection and analysis, decision to publish, or preparation of the manuscript.

**Competing Interests:** Jorge L. Folch-Mallol is currently an Academic Editor for PLOS ONE but this does not alter the authors' adherence to PLOS ONE Editorial policies and criteria.

\* Email: jordi@uaem.mx

☞ These authors contributed equally to this work.

## Introduction

For many years, extremophile microorganisms were described exclusively in the Archae and Eubacteria domains [1]. These peculiar organisms have been found and studied in environments with very extreme conditions such as temperature, pressure, pH, salinity and radiation, among others. Physiological and metabolic studies on extremophile microorganisms derived in the development of biotechnological applications with incidence in the agricultural, pharmacological and environmental industries [2–6]. The description of microbial diversity in extremophile ecosystems has been of great interest for a long time until our days. However, the report of eukaryotic extremophiles took many years.

In particular, environments with high concentrations of salt, called saline and hypersaline environments, have been attractive ecosystems for studying the structures of microbial communities

that inhabit them [7–9], since sodium chloride has been considered an effective microbicide. For example, treating food with salt is an effective method of preserving meat since ancient times [10]. The isolation and characterization of microorganisms in habitats with over 1 M NaCl is important for the identification of metabolites and/or robust proteins with potential industrial applications, and to understand the cellular physiology, molecular biology and biochemistry that support the survival of these organisms under extreme conditions [11–13].

Numerous studies have described halophilic bacterial genera in hypersaline ecosystems [5], [8], [14–21]. However the first report of a fungus isolated from a solar saltern appeared in the year 2000 [22]. Since then, many studies on biodiversity and physiology have reported the characterization of halophilic fungi present in saline and hypersaline ecosystems. Many species of Ascomycetes, and some Basidiomycetes, have been described with the ability to grow in these environments [22], [23]. Currently, the presence of fungi

in the structure of microbial communities that compose some ecosystems with extreme salinity conditions has been described [24]. Until 2009, only 10 orders of fungi known to tolerate low water activity ( $a_w$ ) due to high salt concentrations have been reported [22].

Among the most studied halophilic fungal genera are *Cladosporium* [22], [23], [25], *Wallemia*, *Scopulariopsis*, *Alternaria* [24], [26] and some species of *Aspergillus* and *Penicillium* [23]. Particularly in the *Aspergillus* genera, *A. niger*, *A. sydowii*, *A. flavus*, *A. tubingensis* and *A. versicolor* have been isolated and described as halotolerant and halophile fungi as part of the hypersaline environments [22]. The study of these fungi has allowed the characterization of halophilic enzymes with interesting properties [27]. For example, cellulases and xylanases have been described from halophilic microorganisms, filamentous fungi included, with interesting biochemical properties such as activity in the presence of high salt concentrations, at acidic pH, or in ionic liquids [11], [13], [28–33]. In general, halophilic microorganisms can be isolated from the sea, saline or hypersaline lakes, solar salterns, and salted foods, among other habitats with high concentrations of salt.

It was assumed for a long time that extremophile microorganisms were strictly growing in extreme conditions; however this assumption was proved to be false because there are many examples of extremophiles isolated from non-extreme environments [34–36]. In this way, some reports demonstrate that halophilic and/or halotolerant microorganisms are not restricted to saline or hypersaline habitats and can be found almost everywhere in non-saline environments [37–46]. The general principles of microbial ecology, the physiological plasticity and metabolic versatility of the microorganisms do not impede the isolation of halophile and/or halotolerant organisms from non-saline environments.

The isolation of halophile and/or halotolerant fungi able to grow in lignocellulosic materials is a very interesting source for the search of industrially useful enzymes, potentially capable of producing fermentable sugars from agricultural wastes. One of the major limitations of using enzymes in industry is obtaining robust biocatalysts capable of operating under rigorous industrial conditions. Because of this demand, the study of halophilic and halotolerant microorganisms is an appropriate strategy for the characterization of enzymes such as cellulases, esterases, lipases and xylanases with potential application in biorefineries. Sugarcane bagasse is considered a recalcitrant, high cellulose content agroindustrial waste. The microbial communities growing on sugarcane bagasse, especially filamentous fungi must have efficient enzymes to obtain energy and carbon from lignocellulose degradation. The aims of this work were to characterize a filamentous fungus isolated from sugarcane bagasse with the potential to grow in concentrations of sodium chloride higher than 1 M, and to analyse the lignocellulolytic activities it produces.

## Materials and Methods

### Isolation and preservation of microorganisms

Three grams of non-sterile sugarcane bagasse (as the main carbon source and from where the microorganisms were isolated) were mixed with 2.5 g of sterile soil (as a source of organic matter) into 1000 mL Erlenmeyer flasks containing 250 mL of Vogel's medium as described in [47] and a final concentration of 2 M NaCl. Fermentation was performed at 25°C and 150 rpm for 30 days. Primary isolation of cellulolytic microorganisms was done taking one mL of the sugar bagasse culture and serial dilutions were performed up to  $10^{-10}$ . Two hundred  $\mu$ L of each dilution

were inoculated in Petri plates containing Vogel's medium supplemented with 2% carboxymethylcellulose (CMC, Sigma Catalogue No. C5678) and 0.5 M NaCl. The cultures were incubated for 10 days at 30°C and were observed daily for secondary isolation of cellulolytic bacteria and/or fungi. A fungus was isolated in Potato Dextrose Agar (PDA) and Sabouraud agar media (both from DIFCO). This fungus was stored at 4°C in saline solution (0.5% NaCl) supplemented with glycerol (20%). Isolates were performed in triplicate to achieve representativeness of the obtained microbial populations.

### Identification of a fungal moderate halophilic strain

Mycelium from a fungus growing on PDA plates was collected after 10-days for genomic DNA isolation according to a previously reported method [48]. For identification, we analysed molecular markers previously described to be distinctive to filamentous fungi. A fragment of the 18S ribosomal DNA was amplified by PCR using primers nu-SSU-0817 and nu-SSU-1536 as described by Bormenman and Hartin [49]. Also, regions of the 28S large subunit RNA gene (D1–D2) and internal transcribed spacers 1 (ITS1 region) were amplified. These regions have been particularly useful for the molecular identification of fungi. The primers and conditions used for these PCR reactions have been previously described by Peterson [50] and Hinrikson *et al.* [51], respectively.

Amplicons were analysed in 1% agarose gel electrophoresis in 1x TBE buffer [52] and purified from the agarose gels using a commercial gel extraction kit (Fermentas Catalogue No. K0513) and sequenced in both directions using the same primers used for the amplification. Sanger sequencing was performed at the Sequencing Unit of the Instituto de Biotecnología of the Universidad Nacional Autónoma de México.

The sequences were analysed using the website of the National Centre for Biotechnology Information (NCBI) ([www.ncbi.nih.gov](http://www.ncbi.nih.gov)). BLAST search was performed to determine similar sequences. Phylogeny studies allowed defining the relationship of these sequences with those obtained in the BLAST analysis. Phylogenetic analysis was performed online with the server Phylogeny.fr ([www.phylogeny.fr](http://www.phylogeny.fr)). This platform considers various bioinformatics programs to reconstruct a robust phylogenetic tree from a set of sequences. These tools allowed identification of the fungal strain considering molecular criteria.

Micromorphological identification was performed to complete a polyphasic vision for the microbial identification. Size, shape and grouping of conidiophores, morphological aspects of the colony, and the fungal hyphae were analysed. The aspect of the colony on different media (PDA, Sabouraud agar and Malt extract agar (MEA, from DIFCO) was also considered.

### Growth Rate Determination

Specific growth rate of the fungal colony (expressed as mm/day) was determined as follows. Plugs of 7 mm of diameter obtained from a fungal pre-culture in Vogel's medium supplemented with 2% CMC were inoculated in the same medium at different temperatures (28, 37, and 42°C) or supplemented with NaCl (0, 0.5, 1, 1.5, 2 or 3 M, final concentration). The diameter of the colony was measured every 24 hours for 10 days. Experiments were performed in triplicate for subsequent statistical analysis of data.

### Solid-state Fermentation

Solid-state fermentations were performed using the following autoclaved substrates: agave fibre (*Agave fourcroydes*), sugarcane bagasse (*Saccharum officinarum*), maize stover (*Zea mays*), wheat straw (*Triticum aestivum*), and pine sawdust (*Pinus sylvestris*).

Erlenmeyer flasks of 500 mL including 2 g of each substrate were inoculated with two plugs of 7 mm of diameter of the fungal strain previously grown on PDA plates. Humidity in the system was maintained by adding 20% (w/v) of distilled water to the solids. Fermentation was allowed to take place at 28°C for 10 days. Subsequently, soluble fermentation products were collected in 10 mL in 60 mM citrate buffer pH 5.

### Enzymatic activity determinations

Cellulase activity was determined qualitatively and quantitatively. For qualitative determinations, seven-day cultures of the fungus grown on agar Vogel's medium supplemented with 2% CMC and NaCl (0, 0.5, 1, 1.5, 2 M, final concentration) at 28°C were set up. Petri dishes with the colonies were then inundated with approximately 15 mL of Congo red (1% diluted in distilled water) for 10–15 minutes. Subsequently, these dishes were washed three times with approximately 15 mL of a 1 M NaCl solution. Discoloration halos around the colony indicated the degradation of cellulose due to the production of cellulases [53], [54]. Determinations were performed in triplicate.

For quantitative determination of cellulase activity, plugs of 7 mm of diameter from pre-cultures of the fungus grown in Vogels medium with 2% CMC were inoculated in 500 mL Erlenmeyer flasks with 100 mL of the same medium plus NaCl (0, 0.5, 1, 1.5, 2 M). The flasks were incubated for 9 days at 28°C and 150 rpm. Enzymatic activity and protein concentration were determined every 24 h from 2 mL of the supernatants of these liquid cultures. Enzymatic activity was assessed by the production of reducing sugars from polymeric substrates using the 3,5-dinitrosalicylic acid (DNS) assay described by Miller [55]. Protein concentration was determined by the Lowry method [56]. Enzymatic specific activity is expressed as IU/mg protein.

For cellulases activity measurements, CMC (2%) dissolved in 50 mM citrate buffer pH 5 was used as a substrate. The enzymatic reaction contained 200  $\mu$ L of supernatant, 300  $\mu$ L of 50 mM citrate buffer pH 5 and 500  $\mu$ L of substrate solution. The reaction mixtures were incubated at 50°C for 30 minutes. Briefly, 50  $\mu$ L aliquots were taken every 5 minutes (after adding the supernatant to the reaction mixture) up to 45 minutes and then mixed with 50  $\mu$ L of a DNS solution, boiled for 5 minutes and immediately cooled on ice for 5 minutes. Finally 500  $\mu$ L of water were added and absorbance measured at  $\lambda$  540 nm in a spectrophotometer (BioMate, ThermoSpectronic). Reducing sugars concentration was extrapolated from a glucose standard curve ranging from 0.1 to 2 mg/mL; concentration values were plotted against time, and the slope was calculated to determine the velocity of the reaction. Concentration of released reducing sugars *vs.* time was used to calculate enzymatic activities, where 1 IU is defined as 1  $\mu$ mol of glucose equivalent released per minute, under the assayed conditions. For specific activity calculation, protein concentration in mg/mL was determined against a bovine serum albumin (BSA) standard curve [57]. Xylanases activity was measured in a similar way using 2% oat xylan (Sigma Catalogue No. X0627) as substrate. The absorbance readings were compared against a standard curve of xylose (0.1 to 2 mg/mL).

MnP activity was determined spectrophotometrically ( $\lambda$  270 nm) by following the formation of Mn<sup>3+</sup>-malonate complex at pH 4.5 in 50 mM sodium malonate buffer with 0.5 mM MnSO<sub>4</sub> [58]. To start the reaction, H<sub>2</sub>O<sub>2</sub> was added to a final concentration of 0.1 mM [59]. The reaction was followed for 30 seconds at room temperature.  $\Delta$ Abs min<sup>-1</sup> was converted to UL<sup>-1</sup> using the malonate extinction coefficient of 11 590 M<sup>-1</sup>cm<sup>-1</sup> [58]. MnP specific activity is expressed as IU/mg protein.

Laccase activity was monitored by oxidation of 1 mM of 2,2'-azino-bis(3-ethylbenzthiazoline-6-sulfonic acid) (ABTS) in acetate buffer (pH 4.5), measuring formation of the cation radical ( $\epsilon_{436} = 2.9 \times 10^4$  M<sup>-1</sup> cm<sup>-1</sup>). The reaction mixture volume was 1 mL and was incubated for 30 minutes at room temperature. One unit of laccase activity is defined as the amount of enzyme catalysing the oxidation of 1  $\mu$ mol of substrate per minute.  $\Delta$ Abs min<sup>-1</sup> was determined at  $\lambda$  420 nm using spectrophotometer (BioMate, ThermoSpectronic).

Lipase/esterase and esterase activities were assessed using 2-naphthyl acetate (Sigma Catalogue No. N6875) and 4-nitrophenyl acetate (Sigma Catalogue No. N8130) as substrates, respectively. A stock solution (250  $\mu$ M) of 2-naphthyl acetate was prepared in phosphate buffer saline (PBS) pH 6.5, while a stock solution of 4-nitrophenyl acetate (300  $\mu$ M) was prepared in potassium phosphate buffer pH 6. The reaction volume was 1 mL and it was followed for 30 minutes at room temperature. The determination of these activities was measured spectrophotometrically at  $\lambda$  538 nm for detection of 2-naphthol and at  $\lambda$  410 nm for 4-nitrophenol products of enzymatic hydrolysis of lipase/esterase and esterase respectively, using the molar extinction coefficient for each substrate (23 598 M<sup>-1</sup>cm<sup>-1</sup> for 2-naphthol and 17 700 M<sup>-1</sup>cm<sup>-1</sup> for 4-nitrophenol). Lipase/esterase and esterase specific activities are expressed as IU/mg protein.

To determine all activities we plotted the absorbance values *vs* time, and then calculate the value of the slope of the best fitted line to the experimental points. Previously, we determined the protein concentration as described above. Finally we calculated the volumetric enzymatic and specific enzymatic activities (express as IU/mg protein).

Triplicate independent assays were performed and three readings for each sample were taken in all cases. A BioMate, ThermoSpectronic spectrophotometer was used for all the measurements.

### Zymograms

Zymograms were performed to identify cellulase and xylanase activities from the supernatants of the fungal culture on Vogel's medium supplemented with 2% CMC and NaCl (0, 0.5, 1, 1.5, 2 M), or from soluble products recovered from the solid-state fermentations. Zymograms were performed as described in Quiroz-Castañeda *et al.* [57]. Briefly, 50  $\mu$ g of protein were loaded per lane in the gels for the experiments in media containing NaCl, or 30  $\mu$ g from the samples of the solid-state fermentation experiments. For cellulases, the gels were embedded with 2% CMC, while 2% oat xylan was used in the gels for xylanases. *Trichoderma viride* cellulase (Sigma Catalogue No. 1794), and xylanase (Sigma Catalogue No. 3876) were included as controls. Once the native-PAGE electrophoresis was carried out, gels were incubated with a 1% Congo red solution (in water) for 30 minutes at room temperature and then washed 3 times with a 1 M NaCl solution. The cellulase activity developed as clear bands. The molecular weight of the bands was estimated against a protein marker (Fermentas Catalogue No. 26612).

### Optimal temperature and pH of cellulase activity

Enzyme reactions were performed as described earlier at different incubation temperatures (20, 30, 40, 50, 60, 70 and 80°C) in 50 mM sodium citrate buffer, pH 5. Different pH conditions ranging from 3 to 8 were tested at 50°C in citrate or phosphate buffer depending of the pH tested. All measurements were determined in triplicate.

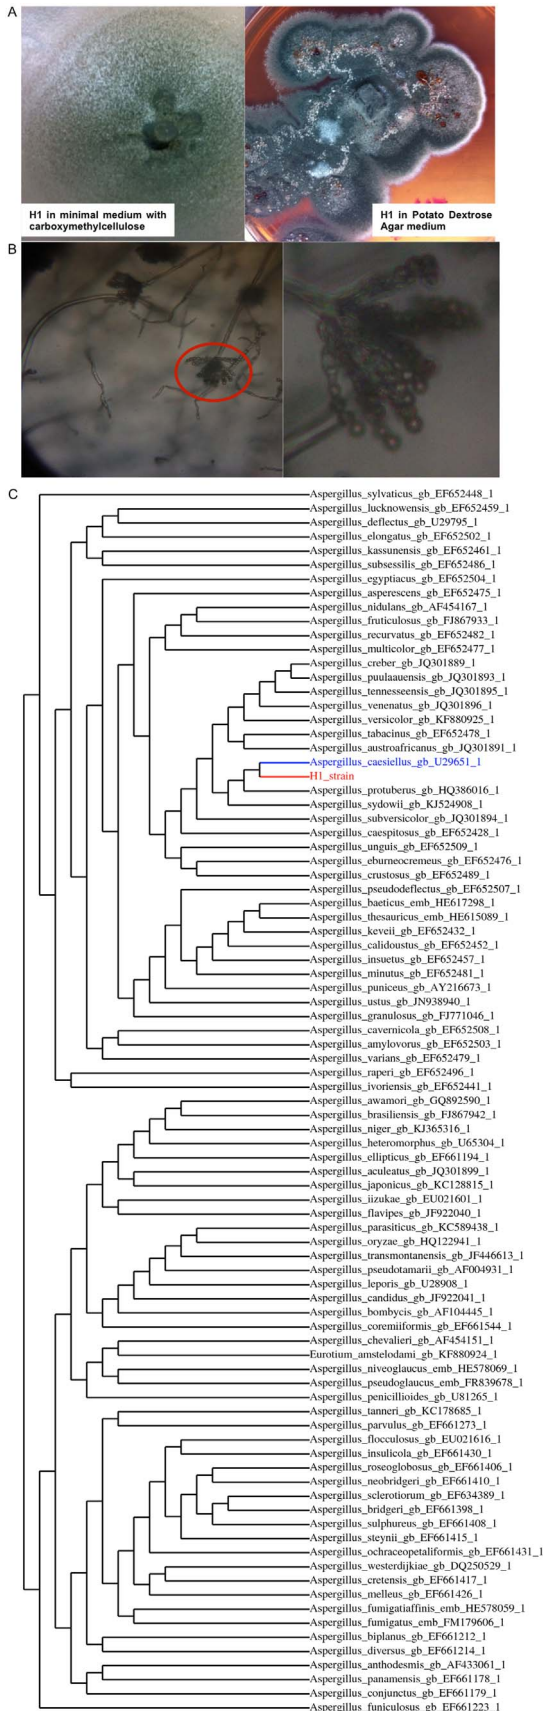

**Figure 1.** (A) *A. caesiellus* grown in Vogel’s medium supplemented with CMC (2%) with 0.5 M NaCl and PDA medium. (B) Microcultures of *A. caesiellus* in Sabouraud Agar medium. (C) Molecular phylogeny for the D1–D2 domain of 28S rDNA gene. doi:10.1371/journal.pone.0105893.g001

**Thermal-stability of the cellulase activity**

Cellulases thermostability was determined by incubating 200 µL of supernatant for 60 minutes at the following temperatures: 30, 40, 50, 60 and 70°C. Subsequently, the samples were cooled on ice for 5 minutes and the residual activity was determined as described before (at 50°C and pH 5). All measurements were performed in triplicate.

**Statistical calculations**

For statistical treatment of experimental data, the arithmetic mean and the standard deviation were calculated. Simple classification ANOVA tests were applied to determine significant differences between the different cases. Firstly, the assumptions of ANOVA were revised: analysis of homogeneity of variance (Hartley-Cochran-Bartlett test) and normal distribution (Kolmogorov-Smirnov and Lilliefors tests) were performed [60]. Subsequently ANOVAs were conducted to demonstrate the similarities or differences between the data of the population of samples. Finally, a post hoc analysis that defines the order of the differences found in the ANOVAs was developed. The Fisher LSD, Tukey HSD and Duncan tests were considered for the post hoc analyses [60], [61]. The use of these three tests ensures greater statistical robustness of the proposed analysis. All statistical calculations were performed in STATISTICA (last version for computers).

**Results and Discussion**

**Isolation of microorganisms**

No bacterial or yeast growth was detected in the primary isolation of microorganisms, whereas a well-represented filamentous fungus was isolated in all serial dilutions up to 10<sup>-5</sup>. This fungal strain was named H1 and showed the capacity to grow in 0.5 M NaCl and CMC as a carbon resource. During the secondary isolation in selective culture media (Sabouraud Agar or PDA added with 0.5 M NaCl) the fungus grew as a dark green colony on the aerial mycelium and brownish-grey in the vegetative mycelium (Figure 1). The production of metabolites secreted as dark brown and bright yellow pigments was evident. The selection forces we used to isolate microorganisms able to degrade lignocellulosic material under high salinity conditions were a complex source of carbon and energy (sugarcane bagasse) and 2 M NaCl. High NaCl concentrations inhibit the growth of most microorganisms; this ratio may explain the very low representation of the microbial population obtained during primary isolation taking in account that it came from a non-saline environment [1], [62–64].

**Identification of H1**

Macroscopic observations of the colony and micromorphological characteristics (hyphae, conidiophores and conidial shape) suggested that the isolate belonged to the genus *Aspergillus* (Figure 1).

Light green grainy colonies were observed in Vogel’s medium with 2% CMC and 0.5 M NaCl, while medium dark green colonies were observed in PDA (Figure 1A). Microscopic examination of the culture mycelia showed columnar conidiophores of approximately 350 µm in length with vesicles 20–35 µm in diameter and pale conidia with globose and subglobose and

smooth spores. Spinose or roughened conidia were never observed. The conidia length was between 5 and 6  $\mu\text{m}$  while the conidia width was approximately 3  $\mu\text{m}$  (Figure 1B). These observations coincide with the characteristics described for *Aspergillus caesiellus* in the CBS-KNAW Fungal Biodiversity Centre ([www.cbs.knaw.nl](http://www.cbs.knaw.nl)).

To confirm the identity of this strain, molecular markers for H1 strain were analysed. We chose to amplify a fragment of the 18S rDNA, the D1–D2 domain (28S rDNA) and the ITS1 region; the determined sequences were annotated in the GenBank with the accession numbers KJ476140, KJ476141 and KJ476142, respectively. BLAST DNA sequences analyses showed similarity with various species of *Aspergilli* demonstrating that H1 belongs to the *Aspergilli* genus.

Many molecular markers with taxonomic value have been described in the genus *Aspergillus*. These include the mitochondrial cytochrome *b* gene [65–67], a putative aflatoxin pathway regulatory gene (*aflR*) [68], the DNA topoisomerase II gene (*TOP2*) [69], the  $\beta$ -tubulin gene [70] and different rDNA gene regions [71]. Among the regions of the rDNA genes the most representative are the 5' end of the large-subunit 28S rDNA gene (D1–D2 region) [50] and the internal transcribed spacers 1 and 2 (ITS1 and ITS2) regions between the small- and large-subunit rDNA genes [51], [71], [72]. It has been reported that for the *Aspergilli*, the ITS1 and D1–D2 regions are the most variable and therefore the most useful for molecular identification of this genus species [51].

To define the species related to H1 strain, phylogenetic reconstructions based on the amplified sequences for each of the molecular markers were studied. Sequences with more than 80% identity and 70% coverage obtained through Blastn analysis were considered to reconstruct the phylogenies. The phylogenetic analysis of the 18S rDNA fragment was inconclusive for species identification. In this case, the H1 sequence does not group with any particular species of *Aspergillus*, although the closest relative to H1 was *Aspergillus versicolor* (Figure S1). On the other hand, the analysis of molecular phylogenies for sequences of the ITS regions were also not conclusive because H1 strain was grouped individually on a single branch of the phylogenetic tree (Figure S1). In this case, the most closely related species was *Aspergillus niger* (Figure S1).

Phylogeny analysis obtained for the sequences of the D1–D2 domain allowed us to propose the identity of strain H1 as *Aspergillus caesiellus*. Numerous studies show this region as very useful for identification filamentous fungi, not only for *Aspergillus* species [73–79]. In this case, our sequence was grouped only with a reference strain of *A. caesiellus* (*A. caesiellus* NRRL a-14879 annotated in the CBS-KNAW Fungal Biodiversity Centre). In this phylogeny it was found that *Aspergillus sydowii* and *Aspergillus protuberus* were the closest species to H1 (Figure 1C).

*A. sydowii* and *A. protuberus* are classified in the *Aspergillus* section *Versicolores* which was established as the *A. versicolor* group by Thom and Church [80] and it was after reconsidered by Thom and Raper [81]. *A. protuberus* does not produce soluble pigments or exudates on MEA and its colonies show reverse light pinkish yellow to pinkish yellow colour. Moreover it presents conidia with finely roughened walls that can also be ellipsoidal to pyriform [82]. *A. sydowii* either produce soluble pigments or exudates on MEA and exhibit colonies with unpigmented reverse to brownish pink colour [82]. *A. sydowii* isolates growing specifically on Saboraud media appear as dark green colonies with a white fringe ([www.thunderhouse4-yuri.blogspot.ie](http://www.thunderhouse4-yuri.blogspot.ie)) and excrete purple pigments [83]. Its colonies on PDA are blue-green colour, reverse reddish and often with reddish exudates. Red-brown

colour in PDA and Czapeks agar media is a very distinctive characteristic of *A. sydowii* [83], [84]. Besides, the micromorphological characterization of this species confirms spherical, and very echinulate or spinose (rough, jagged texture) conidia [83], [84].

Strain H1 shows significant differences with all the above descriptions because the presence of abundant exudates and dark soluble pigments (non-reddish and non-purple) on Saboraud agar, MEA and PDA media was detected and microculture conidia with the previously described characteristics for *A. sydowii* and *A. protuberus* were not observed. Additionally the aspect of the H1's colony does not coincide with those described for the previous two species. Cultural and morphological criteria support the molecular identification proposal for strain H1 because they coincide phylogenetically with H1 and the rooted closest species. Systematics and taxonomy of fungi, especially for the genus *Aspergillus* spp., continue up to day using morpho-culture characters for the distinction between related species [82], [85–88]. On the other hand, *A. protuberus* cannot grow at 37°C [82], while H1 showed thermotolerant behaviour (see next section). In our case, it was critical to evaluate the colony texture, colour on the nutrient media, excretions of exudates and soluble pigments and the characteristics of the conidia to conclude the taxonomic identification. Thus, attending molecular and micromorphological criteria H1 strain was identified as *Aspergillus caesiellus*. We consider that the identification of the strain H1 is robust and conclusive according to the current criteria for identification of filamentous fungi. The polyphasic approach for the identification of microorganisms ensures better taxonomic conclusion according to several studies [89], [90].

*A. caesiellus* has been poorly studied. There are very few reports about the biology and physiology of this filamentous fungus. Some of these studies have reported the potential of this fungus to produce keratinase [91], amylases [92], and invertases [93]. However, little is known about the biology of this species; besides the original report, only few studies describe the isolation of *A. caesiellus* from different sources including air and dust, [94], a marine sponge [95], and chicken litter [91]. *A. caesiellus* has also been reported as a pathogen fungus or opportunistic pathogen [96], [97].

To the best of our knowledge, this is the first report describing the isolation of *A. caesiellus* from samples of lignocellulosic material. This strain is able to grow in different NaCl concentrations and tolerant up to 2 M NaCl. Phylogenetically related species such as *A. versicolor* and *A. sydowii* have been described as halotolerant and halophilic by some authors [22], [98–101]. These species were related to H1 strain in the constructed molecular phylogenies, a finding that also supports its molecular identification. This study demonstrates the flexibility and plasticity of microbial physiology and the possibility to isolate halotolerant and/or halophilic microorganisms from non-hypersaline environments. The assumptions of microbial ecology are general and valid but not absolute in these terms.

### *A. caesiellus* H1 is a moderate halophile and thermotolerant fungus

The growth curves of *A. caesiellus* H1 showed statistically significant greater growth rates in the presence of NaCl as compared to those without NaCl for the three temperatures tested (28, 37 and 42°C) (Figure 2). H1 growth was inhibited only in 3 M NaCl. The higher specific growth rate was obtained in cultures of H1 at 37°C and 1 M NaCl. Similar specific growth rates were observed under conditions of 0.5 and 1 M NaCl in experiments at 28°C, while at 42°C, the higher specific growth rate is achieved in the culture conditions of 1.5 M NaCl (Table 1). These results

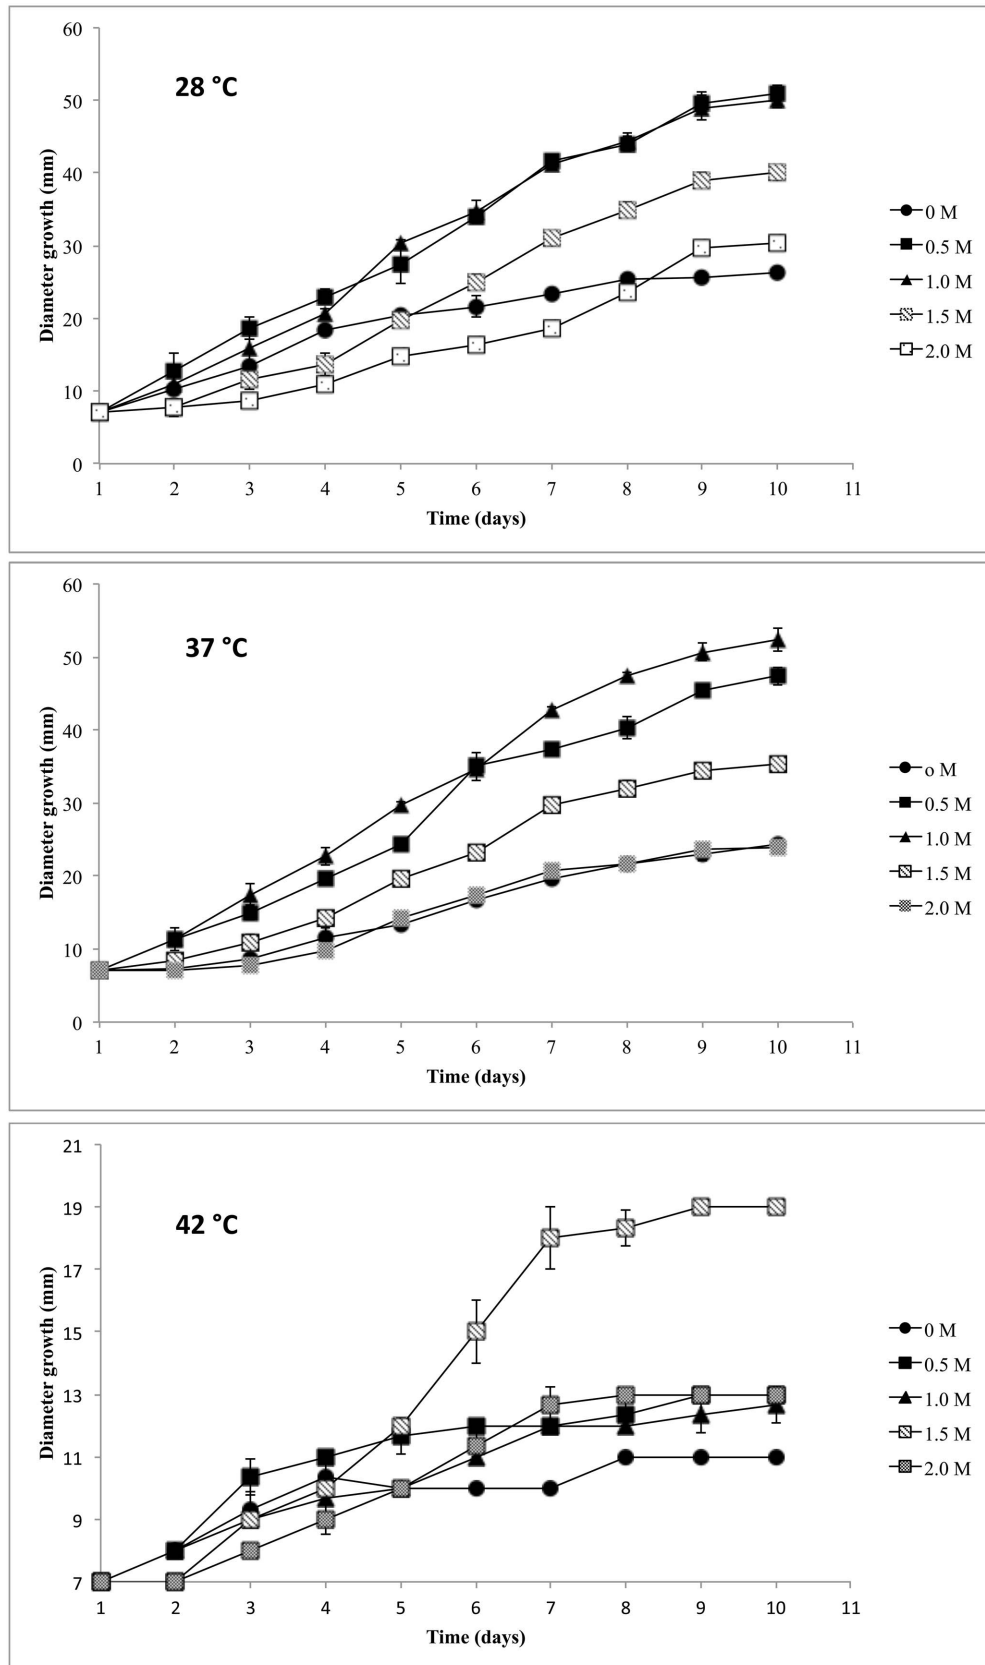

**Figure 2. Growth curves of H1 at different temperatures and NaCl concentrations.**  
 doi:10.1371/journal.pone.0105893.g002

**Table 1.** Specific growth rate (mm/day) of the strain H1 at different temperatures and NaCl concentrations.

| NaCl (M) | Growth rate 28°C       | Growth rate 37°C         | Growth rate 42°C       |
|----------|------------------------|--------------------------|------------------------|
| 0        | 2.17±0.03 <sup>d</sup> | 2.17±0.07 <sup>e</sup>   | 0.39±0.03 <sup>d</sup> |
| 0.5      | 5.12±0.22 <sup>a</sup> | 4.80±0.02 <sup>b</sup>   | 0.62±0.03 <sup>c</sup> |
| 1.0      | 5.22±0.02 <sup>a</sup> | 5.40±0.10 <sup>a</sup>   | 0.63±0.07 <sup>c</sup> |
| 1.5      | 4.18±0.14 <sup>b</sup> | 3.59±0.07 <sup>c</sup>   | 1.62±0.04 <sup>a</sup> |
| 2.0      | 2.81±0.05 <sup>c</sup> | 2.28±0.10 <sup>d e</sup> | 0.80±0.01 <sup>b</sup> |

Different letters indicate different statistical orders.  
doi:10.1371/journal.pone.0105893.t001

show that the H1 is also a thermotolerant strain. Thermotolerant organisms can grow in a range of temperatures above 40°C [102], [103].

There is still much controversy about the definition of extremophile microorganisms. However, one of the most accepted, defines extremophile organisms as those showing optimal growth parameters in different environmental conditions than those normal for humans [104]. In the particular case of halophile microorganisms, there are also disputes about which is the best definition. Certainly it is even difficult to define the boundaries between the concepts: halotolerant and halophile. The establishment of the difference is harder in fungi, even up to date the limits between halotolerant and halophilic strains is not outspoken [46]. However, these definitions are more than fifty years old. Larsen [105] and Kushner and Kamekura [106] introduced three important definitions: moderate halophiles, extreme halophiles and halotolerant.

Halotolerance and halophilia are very clearly defined for Bacteria and Archae. Prokaryotes are classified as obligated halophiles when they require NaCl for optimal growth. Bacteria can be grouped in two categories according with the NaCl concentration required: extremely halophilic or moderately halophilic. In general, definitions mark off extremely halophilic bacteria when they require NaCl concentrations of 2.5–5.2 M (15–30%) for their optimal growth rate, while moderate halophiles grow optimally in media containing 0.5–2.5 M (3–15%) NaCl [107–110]. Some authors have defined for convenience halophilic bacteria as microorganisms that form colonies on agar plates with 20% added NaCl [44]. General definitions as that of Madigan *et al.* [104] classify halophile organisms as those requiring high concentrations of NaCl (1.5 M) to growth optimally. In contrast, halotolerant microorganisms are defined as those showing optimal growth parameters in the absence of salt, but can survive in not-common NaCl concentrations [111], [112].

For fungi, the term halophile was introduced for first time in 1975 to describe xerophilic species inhabiting food that showed superior growth in media with NaCl as the controlling solute [113]. Gunde-Cimerman *et al.* [22], [24] proposed as halophilic or xerophilic fungi those growing well at  $a_w$  of  $\leq 0.85$ , corresponding to 17% NaCl (3 M) or 50% glucose added to their growth medium. In the same review [22] the authors noted that these fungi have different halophilic characteristics when they are compared with the majority of halophilic prokaryotes. Plemenitaš *et al.* [114] described that most halophilic fungi do not require salt for viability because they can show adaptive properties to grow in any salinity range, from freshwater to saturated NaCl concentrations.

Thus, there are several criteria to classify microorganisms attending their growth and survival in different NaCl concentrations. We consider that *A. caesiellus* H1 can be classified as a

moderate halophile fungus because, although it does not exhibit the best growth rate at NaCl concentration higher than 17%, it has greater specific growth rates in the presence of high salt concentrations than those in the absence of NaCl. However, the H1 strain was not isolated from a hypersaline environment and is capable of growing without NaCl in the medium. Our proposed classification attends the halotolerance and halophilic concepts reviewed by different authors. This shows that moderate extremophile microorganisms can live in environments that are not extreme (see Introduction).

This study is the first report of a moderate halophile strain of *A. caesiellus*. Other species have been described in the genus as halophile/halotolerant, for example, *A. versicolor*, *A. sydowii*, *A. flavus*, etc. Some species, such as *A. versicolor* and *A. sydowii* have been found as part of the fungal microbiota of hypersaline environments [22], [99], [100], [115–117].

The physiology and metabolism of microorganisms with the ability to grow in high concentrations of NaCl ensure a number of applications of biotechnological interest [118–121]. In particular, the study of the ability of *A. caesiellus* H1 for degradation of lignocellulosic material became an attraction for our research group. H1 is a strain isolated from sugarcane bagasse, able to grow at a range of NaCl between 0.5 and 2 M and uses cellulose as the sole source of carbon and energy. These qualities point to *A. caesiellus* H1 as a good candidate to study some of its lignocellulolytic enzymes.

### Cellulases activity

Cellulase enzymatic activity was observed at its highest level within the sixth day of culture in 1.5 M NaCl, using CMC as only carbon source at 28°C (Figure 3). From the fifth day on, cultures of H1 in the presence of varying salt concentrations showed higher cellulase specific activity compared to cultures in the absence of NaCl with exception of the 2 M condition, which from day 7 on anyway showed similar activities to the control culture (without NaCl) (Figure 3). To the best of our knowledge this is the first report of cellulase activity for *A. caesiellus*.

Zymograms of supernatants of *A. caesiellus* H1 cultures in CMC as a carbon source showed two isoforms for cellulases (of around 50 and 35 kDa), regardless of the NaCl concentration (Figure 4). The 50 kDa activity band diminishes at high salt concentrations (1.5 and 2 M), since the amount of protein loaded was the same for all the lanes. We were not able to detect any bands in glucose grown cultures in this experiment suggesting that cellulase expression is repressed by glucose (Figure 4, lane 1). These results indicate that cellulases from *A. caesiellus* H1 are capable of functioning at concentrations up to 2 M NaCl, since growth is supported in this condition with CMC as a sole carbon source.

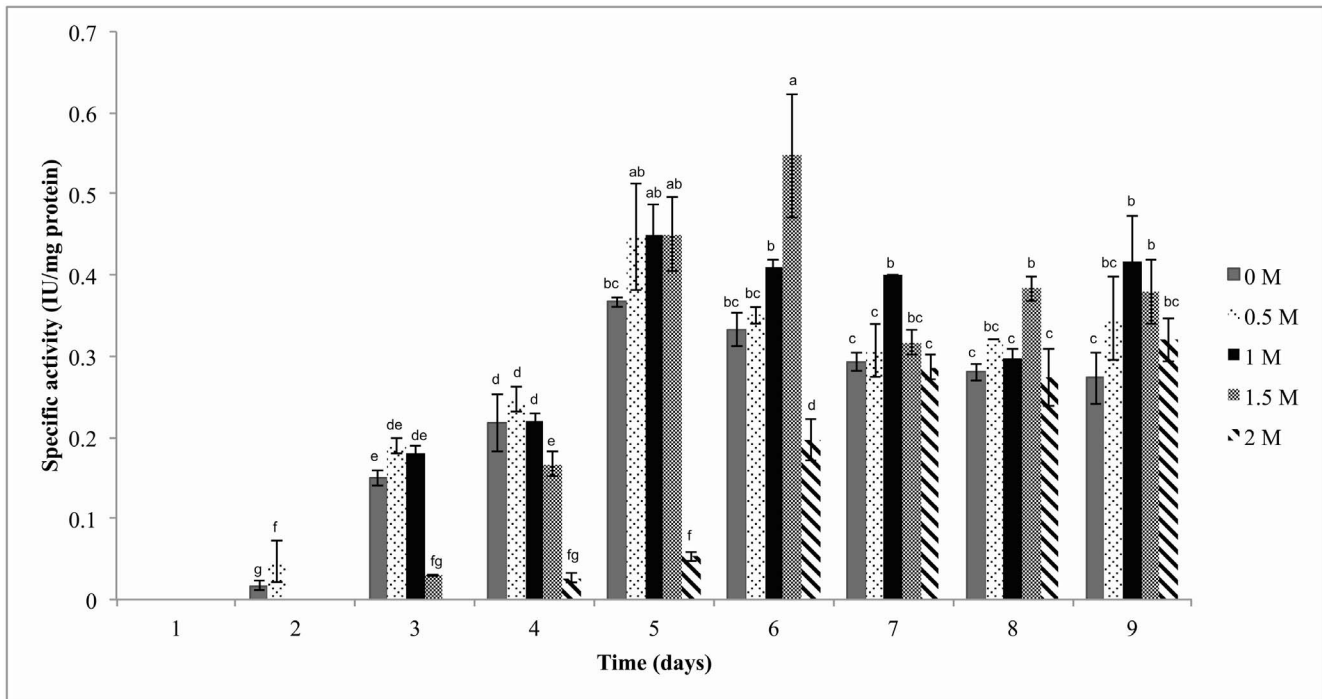

**Figure 3. Cellulase activity of H1 cultures on CMC (2%) as the sole carbon source at different NaCl concentrations.**  
doi:10.1371/journal.pone.0105893.g003

#### Solid-state fermentation of natural substrates by H1

We were interested in testing this fungal strain for enzyme production of lignocellulosic substrates in similar conditions to those found in the field, so solid state fermentations were set up in the absence of NaCl. Wheat straw, maize stover and agave fibres (in that order) were the substrates where the best cellulase and xylanase activities were obtained during solid-state fermentation. Xylanase production was favoured over cellulase production when these substrates were used, and it was higher in wheat straw and maize stover (Figure 5). When a PAGE native gel with embedded xylan was stained with Congo red, four bands of approximately

10, 12, 15 and 20 kDa with xylanase activity were observed for the maize stover fermentation (Figure 6A, lane 3). The 12, 15 and 20 kDa bands also are induced, although in different proportions, when wheat straw and agave fibres were used as substrates, being the 15 kDa band very abundant in the agave fibres fermentation (Figure 6A, lanes 2 and 5). In the sugar cane bagasse fermentation only the 15 kDa band was observed (Figure 6A, lane 4). Again, no xylanase activity was observed in the zymogram when glucose was used as the carbon source Figure 6A, lane 6), indicating a repression by this sugar for xylanases expression. Distinct band patterns were observed for different substrates suggesting a differential expression of xylanases according to the substrate used.

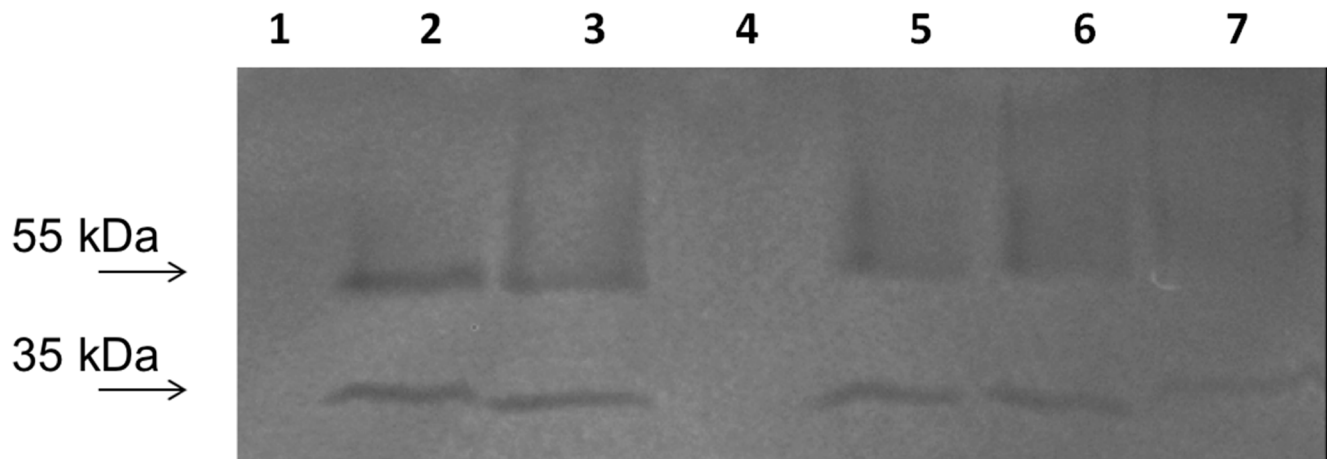

**Figure 4. Zymogram for detection of extracellular cellulases from liquid cultures of strain H1 at different NaCl concentrations in CMC (2%) as the sole carbon source.** Lane 1: Control culture in 2% glucose without NaCl. Lane 2: Culture without NaCl. Lane 3: Culture with 0.5 M NaCl. Lane 4: No sample charge. Lane 5: Culture with 1 M NaCl. Lane 6: Culture with 1.5 M NaCl. Lane 7: Culture with 2 M NaCl. Arrows indicate the position where the molecular weight markers migrated.  
doi:10.1371/journal.pone.0105893.g004



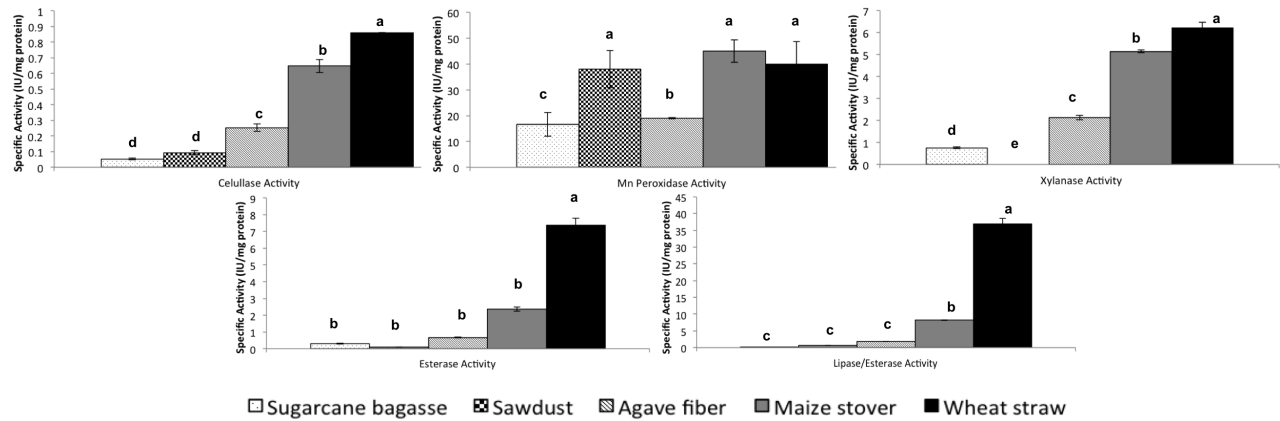

**Figure 5. Enzymatic activities from solid-state fermentation of H1 in different substrates.** Different letters indicate different statistical orders.

doi:10.1371/journal.pone.0105893.g005

In a native gel with cellulose stained with Congo red, we observed three bands with cellulase activity for wheat straw and maize stover cultures, while only two bands were evident in sugarcane bagasse and agave fibres (Figure 6B). Note that in cultures with glucose as a carbon source, only a low basal expression of cellulases is observed (Figure 6B), suggesting again that glucose represses the expression of most of the isoforms of these enzymes. Sawdust proved the worst substrate for induction of these enzymes (Figure 5).

*A. caesiellus* H1 also showed strong Mn peroxidase activity (Figure 5). No statistically significant differences in the Mn peroxidase activity measured in the cultures grown on wheat straw, maize stover and sawdust were observed. In the latter substrates the best Mn peroxidase activity was obtained (Figure 5). Cultures of the fungus in agave fibres and sugarcane bagasse produced lower Mn peroxidase activity with statistically significant differences between them (Figure 5).

Fungal laccases have been widely studied for their industrial applications. However, no laccase activity for H1 strain was detected in any of the conditions we tested.

Wheat straw, maize stover and agave fibres were the substrates where the higher esterase and lipase/esterase activity were determined (Figure 5). This fungus showed a very high lipase/esterase activity with 2-naphthyl acetate as a substrate in wheat straw and maize stover (Figure 5). In general, the substrates where the best enzymatic activities were observed were wheat straw and maize stover. These results support the potential of this fungus to degrade lignocellulosic material and its potential biotechnological applications. Experiments are under way to test H1 for lignocellulosic substrates degradation in the presence of NaCl.

#### Optimum temperature and thermo-stability of cellulases activity

No statistically significant differences in the cellulase activity of the fungus at 50, 60 and 70°C were observed (Figure 7A). When fungal supernatant was incubated for one hour at 60°C, it kept 40% of the cellulases activity (residual activity). This result suggests that *A. caesiellus* cellulases are thermostable. One of the important factors for the industrial application of cellulolytic enzymes is its

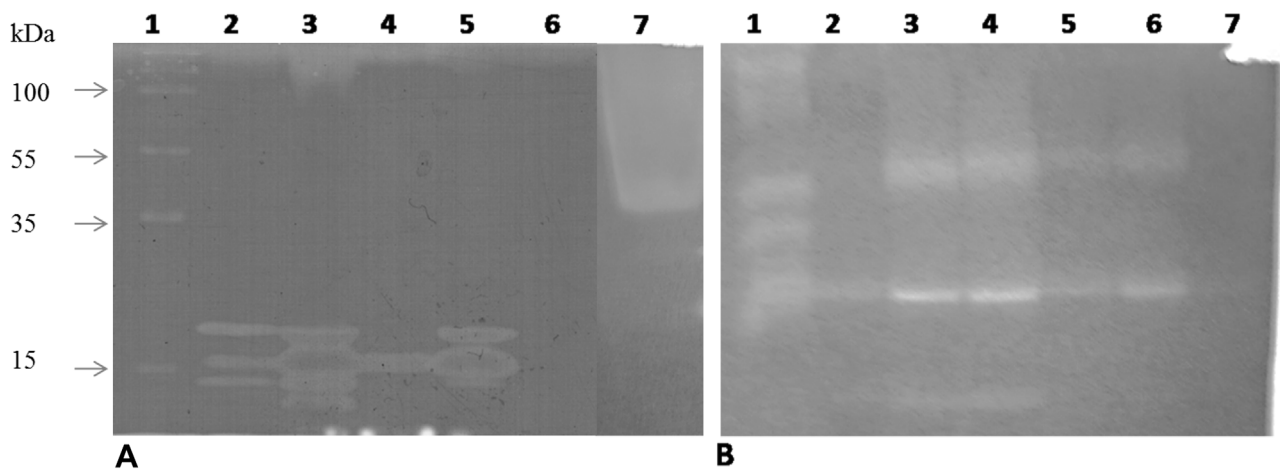

**Figure 6. Zymograms for detection of extracellular xylanases and cellulases from solid-state cultures of H1 in different natural substrates.** (A) Native gel for xylanases. Line 1: Molecular Weight marker. Line 2: Culture in wheat straw. Line 3: Culture in maize stover. Line 4: Culture in sugarcane bagasse. Line 5: Culture in agave fibre. Line 6: Culture in glucose. Line 7: Positive control. Xylanases from *Trichoderma viridae*. (B) Native gel for cellulases. Line 1: Positive control. Cellulases from *Trichoderma viridae*. Line 2: Culture in glucose. Line 3: Culture in wheat straw. Line 4: Culture in maize stover. Line 5: Culture in sugarcane bagasse. Line 6: Culture in agave fibre. Line 7: Culture in sawdust. The arrows indicate bands with activity.

doi:10.1371/journal.pone.0105893.g006

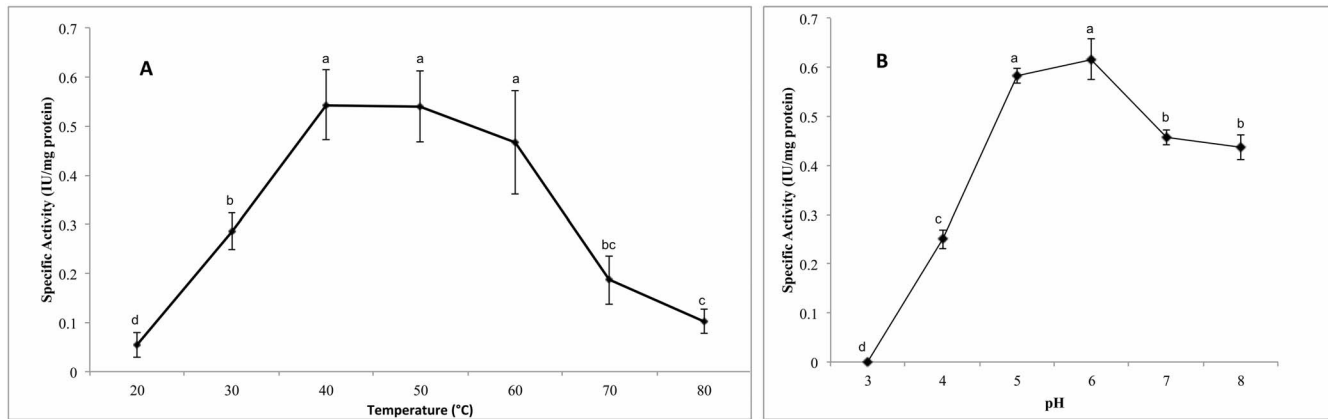

**Figure 7.** (A) Optimal temperature of cellulase activity of H1. (B) Optimal pH of cellulase activity of H1. Different letters indicate different statistical orders.

doi:10.1371/journal.pone.0105893.g007

sturdiness [57], [122–125]. Our results are comparable with those obtained by Liu *et al.* [95] and Raddadi *et al.* [126], and different than those reported by Pang *et al.* [127], since they lost the cellulase activity when supernatant was heated for one hour at 50°C. In our case, the residual activity decreases to 22% (residual activity) when the supernatants were exposed for one hour at 70°C. A similar result was reported by Narra *et al.* [128], who found a dramatic decrease of the cellulolytic activity at this temperature.

### Cellulase Ph Optimum

The best cellulase activity was observed at pH values between 5 and 6 (Figure 7B). This result is consistent for other cellulases [95], [128]. However, some cellulases show optimal pH in the neutral or basic range [127], [129].

In this work we have described the isolation and characterization of a moderate halophile *A. caesiellus* strain that produces thermostable cellulases and other biotechnological interesting activities. Our results show that this strain has a great potential for lignocellulose degradation and could be used for biorefinery applications.

### References

- Oren A (2002) Molecular ecology of extremely halophilic Archaea and Bacteria. *FEMS Microbiology Ecology* 39, 1–7.
- Nicolaus B, Lama L, Manca MC, Gambacorta R (1999) Extremophiles: Polysaccharides and enzymes degrading polysaccharides (INIST-CNRS, Cote INIST: L 27265, 35400008510647.0040: Research signpost, Trivandrum, INDE).
- Conte F (2008) Engineering of glycoside hydrolases of biotechnological interest from extremophilic organisms. Doctoral thesis. Università di Napoli Federico II, Italy.
- Marques E, Uesugi C (2013) Avaliação de bactérias extremófilas facultativas na produção de fitomassa do híbrido “urograndis” de eucalipto, a partir de sementes. *Revista Árvore* 37, 41–47.
- Bhattacharya A, Pletschke B (2014) Review of the enzymatic machinery of *Halothermothrix orenii* with special reference to industrial applications. *Enzyme and Microbial Technology* 55, 159–169.
- Díaz-Tena E, Rodríguez-Ezquerro A, López de Lacalle Marcaide LN, Gurtubay Bustinduy L, Elías-Sáenz A (2014) A sustainable process for material removal on pure copper by use of extremophile bacteria. *Journal of Cleaner Production*. In Press, Corrected Proof: dx.doi.org/10.1016/j.jclepro.2014.01.061.
- Gomes J, Steiner W (2004) The Biocatalytic Potential of Extremophiles and Extremozymes. *Food Technol. Biotechnol.* 42, 223–235.
- Mesbah NM, Wiegand J (2009) *Natronovirga wadinatrunensis* gen. nov., sp. nov. and *Natronaerobius trueperi* sp. nov., halophilic, alkalithermophilic microorganisms from soda lakes of the Wadi An Natrun, Egypt. *Int. J. Syst. Evol. Microbiol.* 59, 2042–2048.
- Hamamura N, Itai T, Liu Y, Reysenbach AL, Damdinsuren N, et al. (2014) Identification of an anaerobic arsenite-oxidizing and arsenate-reducing bacteria associated with an alkaline saline lake in Khovsgol, Mongolia: Arsenic transformation in a Mongolian saline lake. *Environmental Microbiology Reports*. DOI:10.1111/1758-2229.12144.
- Gunde-Cimerman N, Zalar P, de Hoog S, Plemenitaš A (2000) Hypersaline waters in salterns – natural ecological niches for halophilic black yeasts. *FEMS Microbiology Ecology* 32, 235–240.
- Zhang T, Datta S, Eichler J, Ivanova N, Axen SD, et al. (2011) Identification of a haloalkaliphilic and thermostable cellulase with improved ionic liquid tolerance. *Green Chem.* 13, 2083–2090.
- Zhang G, Li S, Xue Y, Mao L, Ma Y (2012) Effects of salts on activity of halophilic cellulase with glucomannanase activity isolated from alkaliphilic and halophilic *Bacillus* sp. BG-CS10. *Extremophiles* 16, 35–43.
- Gunny AN, Arbain D, Edwin Gumba R, Jong BC, Jamal P (2014) Potential halophilic cellulases for in situ enzymatic saccharification of ionic liquids pretreated lignocelluloses. *Bioresource Technology* 155, 177–181.
- Antón J, Oren A, Benlloch S, Rodríguez-Valera F, Amann R, et al. (2002) *Salinibacter ruber* gen. nov., sp. nov., a novel, extremely halophilic member of the Bacteria from saltern crystallizer ponds. *Int. J. Syst. Evol. Microbiol.* 52, 485–491.
- Simmons CW, Claypool JT, Marshall MN, Jabusch LK, Reddy AP, et al. (2014) Characterization of bacterial communities in solarized soil amended with lignocellulosic organic matter. *Applied Soil Ecology* 73, 97–104.
- Sorokin DY, Kolganova TV (2013) Bacterial chitin utilization at halophilic conditions. *Extremophiles* 18, 243–248.

### Supporting Information

**Figure S1 Phylogenies for molecular taxonomic identification of moderate halophile strain H1.** (A) Molecular phylogeny considering the sequence of the fragment of the 18S ribosomal DNA. (B) Molecular phylogeny considering the sequence of the regions of the ITS1 region. (TIF)

### Acknowledgments

We are grateful to Dr. Claudia Martínez-Anaya for her critical review of this manuscript and Mss. Aspasia Giannika for her help in the image editing.

### Author Contributions

Conceived and designed the experiments: JF-M EM-M RB-G EB-L. Performed the experiments: RB-G EB-L LC-S DA-Z KA-H CM-H AS-R. Analyzed the data: JF-M AS-R RB-G EB-L. Contributed reagents/materials/analysis tools: RR-H. Contributed to the writing of the manuscript: RB-G EB-L JF-M.

17. Muruga B, Anyango B (2013) A Survey of Extremophilic Bacteria in Lake Magadi, Kenya. Columbia International Publishing American Journal of Molecular and Cellular Biology 2, 14–26.
18. Challacombe JF, Majid S, Deole R, Bretin TS, Bruce D, et al. (2013) Complete genome sequence of *Halorhodospira halophila* SL1. Stand Genomic Sci 8, 206–214.
19. Mesbah NM, Hedrick DB, Peacock AD, Rohde M, Wiegel J (2007) *Natranaerobius thermophilus* gen. nov., sp. nov., a halophilic, alkalithermophilic bacterium from soda lakes of the Wadi An Natrun, Egypt, and proposal of Natranaerobiaceae fam. nov. and Natranaerobiales ord. nov. Int. J. Syst. Evol. Microbiol. 57, 2507–2512.
20. Leela A (2013) Catalytic properties and industrial potential of halophilic extracellular protease from salt – pan isolates. PhD Thesis. Bharathidassan University.
21. Roldán-Carrillo T, Castorena-Cortés G, Reyes-Avila J, Zapata-Peñasco I, Olguín-Lora P (2013) Effect of porous media types on oil recovery by indigenous microorganisms from a Mexican oil field. Journal of Chemical Technology & Biotechnology 88, 1023–1029.
22. Gunde-Cimerman N, Ramos J, Plemenitaš A (2009) Halotolerant and halophilic fungi. Mycological Research 113, 1231–1241.
23. Butinar L, Zalar P, Frisvad JC, Gunde-Cimerman N (2005) The genus *Eurotium* - members of indigenous fungal community in hypersaline waters of salterns. FEMS Microbiol. Ecol. 51, 155–166.
24. Gunde-Cimerman N, Butinar L, Sonjak S, Turk M, Uršič V, et al. (2005) Halotolerant and Halophilic Fungi from Coastal Environments in the Arctics. In Adaptation to Life at High Salt Concentrations in Archaea, Bacteria, and Eukarya, N. Gunde-Cimerman, A. Oren, and A. Plemenitaš, eds. (Springer Netherlands), 397–423.
25. Zalar P, Hoog GS de, Schroers HJ, Crous J, Groenewald JZ, et al. (2007) Phylogeny and ecology of the ubiquitous saprobe *Cladosporium sphaerospermum*, with descriptions of seven new species from hypersaline environments. Studies in Mycology 58, 157–183.
26. Zalar P, Sybren de Hoog G, Schroers HJ, Frank JM, Gunde-Cimerman N (2005) Taxonomy and phylogeny of the xerophilic genus *Wallemia* (Wallemiomycetes and Wallemiales, cl. et ord. nov.). Antonie Van Leeuwenhoek 87, 311–328.
27. DasSarma S, Aurora P (2012) Halophiles. In eLS, John Wiley & Sons, Ltd, Chichester. United Kingdom. DOI:10.9780470015902, a0000394.
28. Molitoris HP, Buchalo AS, Kurchenko I, Nevo E, Rawal BS, et al (2000) Physiological diversity of the first filamentous fungi isolated from the hypersaline dead sea. Fungal Diversity 5, 55–70.
29. Kutateladze NZ (2009) Selection of Microscopic Fungi - Pectinase Producers. Bulletin of the Georgian National Academy of Science 3.
30. Li X, Wang HL, Li T, Yu HY (2012) Purification and characterization of an organic solvent-tolerant alkaline cellulase from a halophilic isolate of *Thalassobacillus*. Biotechnol. Lett. 34, 1531–1536.
31. Xue DS, Chen HY, Lin DQ, Guan YX, Yao SJ (2012) Optimization of a natural medium for cellulase by a marine *Aspergillus niger* using response surface methodology. Appl. Biochem. Biotechnol. 167, 1963–1972.
32. Ren W, Zhang F, Yang X, Tang S, Ming H, et al. (2013) Purification and properties of a SDS-resistant xylanase from halophilic *Streptomonospora* sp. YIM 90494. Cellulose 20, 1947–1955.
33. Liu X, Huang Z, Zhang X, Shao Z, Liu Z (2014) Cloning, expression and characterization of a novel cold-active and halophilic xylanase from *Zuonongwangia profunda*. Extremophiles 18, 441–450.
34. Onishi H, Fuchi H, Konomi K, Hidaka O, Kamekura M (1980) Isolation and distribution of a variety of halophilic bacteria and their classification by salt-response. Agric Biol Chem 44, 1253–1258.
35. Horikoshi K (1999) Alkaliphiles: some applications of their products for biotechnology. Microbiol Mol Biol Rev 63, 735–750.
36. Saiz-Jimenez C, Laiz L (2000) Occurrence of halotolerant/halophilic bacterial communities in deteriorated monuments. Int Biodeterior Biodegrad 46, 319–326.
37. Abdel-Fatez S (1981) Halophilic fungi of desert soils in Saudi Arabia. Mycopathologia 75, 75–80.
38. Moubasher A, Abdel-Hafez S, Bagy M, Abdel-Satar M (1990) Halophilic and halotolerant fungi in cultivated desert and salt marsh soils from Egypt. Acta Mycologica 26, 65–81.
39. Nielsen P, Fritze D, Priest FG (1995) Phenetic diversity of alkaliphilic *Bacillus* strains: proposal for nine new species. Microbiology 141, 1745–1761.
40. Castillo G, Demoulin V (1997) NaCl salinity and temperature effects on growth of three wood-rotting basidiomycetes from a Papua New Guinea coastal forest. Mycol Res 101, 341–344.
41. Arahall DR, Marquez MC, Volcani BE, Schleifer KH, Ventosa A (1999) *Bacillus marismortui* sp. nov., a new moderately halophilic species from the Dead Sea. Int J Syst Bacteriol 49, 521–530.
42. Piñar G, Ramos C, Rölleke S, Schabereiter-Gurtner C, Vybiral D, et al. (2001) Detection of indigenous *Halobacillus* populations in damaged ancient wall paintings and building materials: molecular monitoring and cultivation. Appl Environ Microbiol 67, 4891–4895.
43. Santos SX, Carvalho CC, Bonfá MR, Silva R, Gomes E (2004) Screening for pectinolytic activity of wood-rotting Basidiomycetes and characterization of the enzymes. Folia Microbiol 49, 46–52.
44. Echigo A, Hino M, Fukushima T, Mizuki T, Kamekura M, et al. (2005) Endospore of halophilic bacteria of the family Bacillaceae isolated from non-saline Japanese soil may be transported by Kosa event (Asian dust storm). Saline Systems 1, 1–13.
45. Abrahão MC, Gugliotta AM, Da Silva R, Fujieda RJ, Boscolo M, et al. (2008) Lignolytic activity from newly isolated basidiomycete strains and effect of these enzymes on the azo dye orange II decolourisation. Annals Microbiol 58, 427–432.
46. Arakaki R, Monteiro D, Boscolo R, Gomes E (2013) Halotolerance, ligninase production and herbicide degradation ability of basidiomycetes strains. Brazilian Journal of Microbiology 44, 1207–1214.
47. Vogel HJ (1956) A convenient growth medium for *Neurospora* (Medium N). Microbiol Genet Bull 13, 42–43.
48. Kuhad RC, Kapoor RK, Lal R (2004) Improving the yield and quality of DNA isolated from white-rot fungi. Folia Microbiol 49, 112–116.
49. Borneman J, Hartin RJ (2000) PCR Primers that amplify fungal rRNA genes from environmental samples. Appl Environ Microbiol 66, 4356–4360.
50. Peterson SW (2000) Integration of modern taxonomic methods for *Penicillium* and *Aspergillus*. Phylogenetic relationships in *Aspergillus* based on rDNA sequence analysis. (Amsterdam: Harwood Academic Publishers.), 323–355.
51. Hinrikson HP, Hurst SF, Lott TJ, Warnock DW, Morrison CJ (2005) Assessment of ribosomal large-subunit D1–D2, internal transcribed spacer 1, and internal transcribed spacer 2 regions as targets for molecular identification of medically important *Aspergillus* species. J. Clin. Microbiol. 43, 2092–2103.
52. Sambrook J, Russell DW (2001) Molecular Cloning: A Laboratory Manual (Cold Spring Harbor Laboratory Press).
53. Teather RM, Wood PJ (1982) Use of Congo red-polysaccharide interactions in enumeration and characterization of cellulolytic bacteria from the bovine rumen. Appl. Environ. Microbiol. 43, 777–780.
54. Onsoni H, Zamani MR, Motallebi M, Zarghami N (2005) Identification of over producer strain of endo-β-1,4-glucanase in *Aspergillus* Species: Characterization of crude carboxymethyl cellulase. African Journal of Bacteriology 4, 26–30.
55. Miller GL (1959) Use of Dinitrosalicylic Acid Reagent for Determination of Reducing Sugar. Anal. Chem. 31, 426–428.
56. Lowry OH, Rosebrough NJ, Farr AL, Randall RJ (1951) Protein Measurement with the Folin Phenol Reagent. J. Biol. Chem. 193, 265–275.
57. Quiroz-Castañeda RE, Balcázar-López E, Dantán-González E, Martínez A, Folch-Mallol J, et al. (2009) Characterization of cellulolytic activities of *Bjerkandera adusta* and *Pycnoporus sanguineus* on solid wheat straw medium. Electronic Journal of Biotechnology 12.
58. Järvinen J, Taskila S, Isomäki R, Ojamo H (2012) Screening of white-rot fungi manganese peroxidases: a comparison between the specific activities of the enzyme from different native producers. AMB Express 2, 62.
59. Wariishi H, Valli K, Gold MH (1992) Manganese(II) oxidation by manganese peroxidase from the basidiomycete *Phanerochaete chrysosporium*. Kinetic mechanism and role of chelators. J. Biol. Chem. 267, 23688–23695.
60. Hoaglin DC, Welsh RE (1978) The Hat Matrix in Regression and ANOVA. The American Statistician 32, 17–22.
61. Fisher RA, Yates F (1949) Statistical tables for biological, agricultural and medical research. Edinburgh, Oliver and Boyd Ltd. Ed. 3, 112.
62. Evans S, Hansen RW, Stone HM, Schneegurt MA (2013) Isolation and Characterization of Halotolerant Soil Fungi from the Great Salt Plains of Oklahoma (USA). Cryptogamic, Mycology 34, 329–341.
63. Konte T, Plemenitaš A (2013) The HOG signal transduction pathway in the halophilic fungus *Wallemia ichthyophaga*: identification and characterization of MAP kinases WiHog1A and WiHog1B. Extremophiles 17, 623–636.
64. Shtarkman YM, Koçer ZA, Edgar R, Veerapaneni RS, D'Elia T, et al. (2013) Subglacial Lake Vostok (Antarctica) Accretion Ice Contains a Diverse Set of Sequences from Aquatic, Marine and Sediment-Inhabiting Bacteria and Eukarya. PLoS ONE 8, e67221.
65. Wang L, Yokoyama K, Takahashi H, Kase N, Hanya Y, et al. (2001) Identification of species in *Aspergillus* section Flavi based on sequencing of the mitochondrial cytochrome b gene. International Journal of Food Microbiology 71, 75–86.
66. Yokoyama K, Wang L, Miyaji M, Nishimura K (2001) Identification, classification and phylogeny of the *Aspergillus* section Nigri inferred from mitochondrial cytochrome b gene. FEMS Microbiology Letters 200, 241–246.
67. Spiess B, Buchheidt D (2013) Protocol of a LightCycler PCR Assay for Detection and Quantification of *Aspergillus fumigatus* DNA in Clinical Samples of Neutropenic Patients. In Laboratory Protocols in Fungal Biology, V.K. Gupta, M.G. Tuohy, M. Ayyachamy, K.M. Turner, and A. O'Donovan, eds. (Springer New York), 315–320.
68. Chang PK, Bhatnagar D, Cleveland TE, Bennett JW (1995) Sequence variability in homologs of the aflatoxin pathway gene *aflR* distinguishes species in *Aspergillus* section Flavi. Appl. Environ. Microbiol. 61, 40–43.
69. Kanbe T, Yamaki K, Kikuchi A (2002) Identification of the Pathogenic *Aspergillus* Species by Nested PCR Using a Mixture of Specific Primers to DNA Topoisomerase II Gene. Microbiology and Immunology 46, 841–848.
70. Geiser DM, Pitt JI, Taylor JW (1998) Cryptic speciation and recombination in the aflatoxin-producing fungus *Aspergillus flavus*. Proc. Natl. Acad. Sci. USA 95, 388–393.

71. Iwen PC, Hinrichs SH, Rupp ME (2002) Utilization of the internal transcribed spacer regions as molecular targets to detect and identify human fungal pathogens. *Med. Mycol.* 40, 87–109.
72. White TJ, Bruns T, Lee S, Taylor J (1990) Amplification and direct sequencing of fungal ribosomal RNA genes for phylogenetics (In M. A. Innis, D. H. Gelfand, J. J. Sninsky, and T. J. White (ed.), PCR protocols—a guide to methods and applications. Academic Press, San Diego, Calif).
73. Guarro J (2012) Taxonomía y biología de los hongos causantes de infección en humanos. *Enfermedades Infecciosas y Microbiología Clínica* 30, 33–39.
74. Kwiatkowski NP, Babiker WM, Merz WG, Carroll KC, Zhang SX (2012) Evaluation of Nucleic Acid Sequencing of the D1/D2 Region of the Large Subunit of the 28S rDNA and the Internal Transcribed Spacer Region Using SmartGene IDNS Software for Identification of Filamentous Fungi in a Clinical Laboratory. *The Journal of Molecular Diagnostics* 14, 393–401.
75. Massire C, Buelow DR, Zhang SX, Lovari R, Matthews HE, et al. (2013) PCR Followed by Electrospray Ionization Mass Spectrometry for Broad-Range Identification of Fungal Pathogens. *J. Clin. Microbiol.* 51, 959–966.
76. Otero V, Galán-Sánchez F, García-Agudo L, García-Tapia AM, Guerrero-Lozano I, et al. (2013) Fungemia por *Trichosporon asahii* en paciente con neoplasia hematológica. *Revista Iberoamericana de Micología*. <http://dx.doi.org/10.1016/j.riam.2013.09.001>.
77. Santos DW, Padovan AC, Melo AS, Gonçalves SS, Azevedo VR, et al. (2013) Molecular Identification of Melanised Non-Sporulating Moulds: A Useful Tool for Studying the Epidemiology of Phaeohyphomycosis. *Mycopathologia* 175, 445–454.
78. Alam MZ, Alam Q, Jiman-Fatani A, Kamal MA, Abuzenadah AM, et al. (2014) *Candida* identification: a journey from conventional to molecular methods in medical mycology. *World Journal Microbiol Biotechnol* 1–15.
79. Kim MJ, Park PW, Ahn JY, Kim KH, Seo JY, et al. (2014) Fatal Pulmonary Mucormycosis Caused by *Rhizopus microsporus* in a Patient with Diabetes. *Annals of Laboratory Medicine* 34, 76.
80. Thom G, Church M (1926) *The Aspergilli*. Baltimore, MD: Williams and Wilkins Co.
81. Thom G, Raper K (1945) *Manual of the Aspergilli*. Baltimore, MD: Williams and Wilkins Co.
82. Jurjevic Z, Stephen W, Bruce W (2012) *Aspergillus* section Versiolores: nine new species and multilocus DNA sequence based phylogeny. *IMA Fungus: The Global Mycological Journal* 3, 59–79.
83. Panchagnula B, Terlir R (2013) Morphological and molecular characterization of a lipolytic marine fungal isolate *Aspergillus sydowii* strain BTSS1005. *International Journal of Biology, Pharmacy and Allied Sciences* 2, 1488–1500.
84. Bindia P, Ramana T (2012) Optimization of lipase production from an indigenous isolated marine *Aspergillus sydowii* of Bay of Bengal. *Journal of Biochemical Technology* 3, 203–211.
85. Klich M (2002) Identification of common *Aspergillus* species. Centraalbureau voor Schimmcultures, Utrecht, The Netherlands.
86. Sugui J, Peterson S, Clark L, Nardone G, Folio L, et al. (2012) *Aspergillus tanneri* sp. nov., a new pathogen that causes invasive disease refractory to antifungal therapy. *J. Clin. Microbiol* 50, 3309–3317.
87. Krimitzas A, Pырi I, Kouvelis V, Kapsanaki-Gotsi E, Typas M (2013) A phylogenetic analysis of Greek isolates of *Aspergillus* species based on morphology and nuclear and mitochondrial gene sequences. *BioMed Research International*. [Doi:10.1155/2013/260395](https://doi.org/10.1155/2013/260395).
88. Barton R (2013) Laboratory diagnosis of invasive aspergillosis: from diagnosis to prediction of outcome. *Scientifica*. [Doi:10.1155/2013/459405](https://doi.org/10.1155/2013/459405).
89. Passarini MR, Santos C, Lima N, Berlinck RS, Sette LD (2013) Filamentous fungi from the Atlantic marine sponge *Drumacidon reticulatum*. *Arch Microbiol* 195, 99–111.
90. Krishnamurthi S (2014) The Study of Prokaryotic diversity of a landfill environment using a polyphasic taxonomic approach. *INFLIBNET*. <http://hdl.handle.net/10603/14893>.
91. Marcondes NR, Taira CL, Vandresen DC, Svidzinski TI, Kadowaki MK, et al. (2008) New Feather-Degrading Filamentous Fungi. *Microb Ecol* 56, 13–17.
92. De Paris LD, Scheufele FB, Teixeira T, Guerreiro TL, Hasan SD (2010) Estudo do crescimento de *A. caesiellus* em farelo de soja convencional para produção de enzimas. *Estudos Tecnológicos Em Engenharia* 6.
93. Novaki L, Hasan S, Kadowaki M, Andrade D (2010) Produção de invertase por fermentação em estado sólido a partir de farelo de soja. *ENGEVISTA* 12.
94. Lugauskas A, Krikštaponis A (2004) Filamentous Fungi Isolated in Hospitals and Some Medical Institutions in Lithuania. *Indoor and Built Environment* 13, 101–108.
95. Liu D, Zhang R, Yang X, Wu H, Xu D, et al. (2011) Thermostable cellulase production of *Aspergillus fumigatus* Z5 under solid-state fermentation and its application in degradation of agricultural wastes. *International Biodeterioration & Biodegradation* 65, 717–725.
96. Denning DW (1998) Invasive aspergillosis. *Clinical Infectious Diseases* 26, 584–589.
97. Browman J, Panizza B, Gandhi M (2007) Sphenoid sinus fungal balls. *Annals of Otolaryngology, Rhinology and Laryngology* 116, 514–519.
98. Abdel-Hafez SI (1981) Halophilic fungi of desert soils in Saudi Arabia. *Mycopathologia* 75, 75–80.
99. Butinar L, Frisvad JC, Gunde-Cimerman N (2011) Hypersaline waters – a potential source of foodborne toxigenic aspergilli and penicillin. *FEMS Microbiology Ecology* 77, 186–199.
100. Nayak S, Gonsalves V, Nazareth S (2012) Isolation and salt tolerance of halophilic fungi from mangroves and solar salterns in Goa - India. *IJMS* 41, 164–172.
101. Oren A, Gunde-Cimerman N (2012) Fungal Life in the Dead Sea. In *Biology of Marine Fungi*, C. Raghukumar, ed. (Springer Berlin Heidelberg), 115–132.
102. Kumar M, Yadav AN, Tiwari R, Prasanna R, Saxena AK (2014) Deciphering the diversity of culturable thermotolerant bacteria from Manikaran hot springs. *Ann Microbiol* 1–11.
103. Maller A, Silva TM, Damásio AR, Hirata IY, Jorge JA, et al. (2013) Functional properties of a manganese-activated exo-polygalacturonase produced by a thermotolerant fungus *Aspergillus niveus*. *Folia Microbiol* 58, 615–621.
104. Madigan M, Martinko J, Stahl D, Clark D (2012) *Brock Biology of Microorganisms* (San Francisco, USA: (13 Eth) Pearson Education).
105. Larsen H (1962) Halophilism. *The Bacteria* 4, 297–342.
106. Kushner DJ, Kamekura M (1988) Physiology of halophilic eubacteria. In *Halophilic bacteria Volume I*. Boca Raton, CRC Press 109–140.
107. González C, Gutiérrez C, Ramírez C (1978) *Halobacterium vallismortis* sp. nov. an amylolytic and carbohydrate-metabolizing, extremely halophilic bacterium. *Can J Microbiol* 24, 710–715.
108. Hao MV, Kocur M, Komagata K (1984) *Marinococcus* gen nov., a new genus for motile cocci with meso-diaminopimelic acid in the cell wall; and *Marinococcus albus* sp. nov. and *Marinococcus halophilus* (Novitsky and Kushner) comb. nov. *J Gen Appl Microbiol* 30, 449–459.
109. Zvyagintseva IS, Tarasov AL (1987) Extreme halophilic bacteria from saline soils. *Mikrobiologiya* 56, 839–844.
110. Bouchotroch S, Quesada E, del Moral A, Llamas I, Bejar V (2001) *Halomonas maura* sp. nov., a novel moderately halophilic, exopolysaccharide-producing bacterium. *Int J Syst Evol Microbiol* 51, 1625–32.
111. Kivisto A, Karp M (2011) Halophilic anaerobic fermentative bacteria. *Review. J Biotechnol* 152, 114–124.
112. Yoon JH, Kang KH, Park YH (2003) *Halobacillus salinus* sp. nov., iso-lated from a salt lake on the coast of the East Sea in Korea. *Int J Syst Evol Microbiol* 53, 687–93.
113. Pitt J, Hocking A (1985) *Fungi and food spoilage*, First edition. Academic Press, Sydney.
114. Plemenitaš A, Vaupotic T, Lenassi M, Kogej T, Gunde-Cimerman N (2008) Adaptation of extremely yeast *Hortaea werneckii* to increased osmolarity: a molecular perspective at a glance. *Studies in Mycology* 61, 67–75.
115. Dave G, Modi H (2013) Phytase producing microbial species associated with rhizosphere of mangroves in an Arid Coastal Region of Dholara. *Academia Journal of Biotechnology* 1, 027–035.
116. Dhanasekaran P (2014) Anti-infective potential of halophilic actinomycetes isolated from saltpan. *Malaya Journal of Biosciences* 1, 37–40.
117. Trincone A (2013) Biocatalytic Processes Using Marine Biocatalysts: Ten Cases in Point. *Current Organic Chemistry* 17, 1058–1066.
118. Margesin R, Schinner F (2001) Potential of halotolerant and halophilic microorganisms for biotechnology. *Extremophiles* 5, 73–83.
119. Babavalian H, Amoozegar MA, Pourbabae AA, Moghaddam MM, Shakeri F (2013) Isolation and identification of moderately halophilic bacteria producing hydrolytic enzymes from the largest hypersaline playa in Iran. *Microbiology* 82, 466–474.
120. Bonfá MR, Grossman MJ, Piubeli F, Mellado E, Durrant LR (2013) Phenol degradation by halophilic bacteria isolated from hypersaline environments. *Biodegradation* 24, 699–709.
121. Oren A, Bardavid RE, Mana L (2014) Perchlorate and halophilic prokaryotes: implications for possible halophilic life on Mars. *Extremophiles* 18, 75–80.
122. Parawira W (2012) Enzyme research and applications in biotechnological intensification of biogas production. *Critical Reviews in Biotechnology* 32, 172–186.
123. Bhat MK, Bhat S (1997) Cellulose degrading enzymes and their potential industrial applications. *Biotechnology Advances* 15, 583–620.
124. Valderrama B, Ayala M, Vazquez-Duhalt R (2002) Suicide Inactivation of Peroxidases and the Challenge of Engineering More Robust Enzymes. *Chemistry & Biology* 9, 555–565.
125. Jiang Y, Liu X, Chen Y, Zhou L, He Y, et al. (2014) Pickering emulsion stabilized by lipase-containing periodic mesoporous organosilica particles: A robust biocatalyst system for biodiesel production. *Bioresource Technology* 153, 278–283.
126. Raddadi N, Cherif A, Daffonchio D, Fava F (2013) Halo-alkalitolerant and thermostable cellulases with improved tolerance to ionic liquids and organic solvents from *Paenibacillus tarimensis* isolated from the Chott El Fejej, Sahara desert, Tunisia. *Bioresource Technology* 150, 121–128.
127. Pang H, Zhang P, Duan CJ, Mo XC, Tang JL, et al. (2009) Identification of Cellulase Genes from the Metagenomes of Compost Soils and Functional Characterization of One Novel Endoglucanase. *Curr Microbiol* 58, 404–408.
128. Narra M, Dixit G, Divecha J, Kumar K, Madamwar D, et al. (2014) Production, purification and characterization of a novel GH 12 family endoglucanase from *Aspergillus terreus* and its application in enzymatic degradation of delignified rice straw. *International Biodeterioration & Biodegradation* 88, 150–161.
129. Li X, Yu HY (2013) Characterization of a halostable endoglucanase with organic solvent-tolerant property from *Haloarcula* sp. G10. *International Journal of Biological Macromolecules* 62, 101–106.
